# Supplementary material for: The addiction behavior of short-form video app TikTok: The information quality and system quality perspective
Source: PubMed Central journal article supplement (PMC9486470; doi:10.3389/fpsyg.2022.932805), 2022-09-06
Supplement: Data_Sheet_1.pdf [file Data_Sheet_1.pdf]

## Appendix

Table 1 Measurement

| Construct           | Dimension                                                                                         | Measurement Items                                                                        | Sources               |                      |
|---------------------|---------------------------------------------------------------------------------------------------|------------------------------------------------------------------------------------------|-----------------------|----------------------|
| Information Quality | Conciseness                                                                                       | Short videos on ___ are usually short.                                                   | (Lee & Kim, 2017)     |                      |
|                     |                                                                                                   | I spend very short time reading one message on ___.                                      |                       |                      |
|                     |                                                                                                   | I can understand the overall meaning of a ___ in a short time.                           |                       |                      |
|                     | Subscription                                                                                      | I can subscribe some interesting ___ users.                                              |                       | (Zhang et al., 2016) |
|                     |                                                                                                   | I can subscribe ___ whose video content are useful for my work or study.                 |                       |                      |
|                     |                                                                                                   | I can gain useful information from ___ users that I subscribe.                           |                       |                      |
| Usefulness          | Subscription can help me filter and distinguish information that I consider as misleading on ___. | (Nelson et al., 2005)                                                                    |                       |                      |
|                     | The information on ___ is useful for work or study.                                               |                                                                                          |                       |                      |
|                     | The information on ___ is valuable.                                                               |                                                                                          |                       |                      |
| System Quality      | Flexibility                                                                                       | The information on ___ can satisfy my needs.                                             | (Nelson et al., 2005) |                      |
|                     |                                                                                                   | The information on ___ were informative.                                                 |                       |                      |
|                     | Integration                                                                                       | ___ provides me with interesting videos to my needs.                                     |                       |                      |
| System Quality      | Flexibility                                                                                       | ___ can be adapted to meet a variety of needs.                                           | (Nelson et al., 2005) |                      |
|                     |                                                                                                   | ___ can flexibly adjust to new demands or conditions.                                    |                       |                      |
| System Quality      | Integration                                                                                       | ___ is versatile in addressing needs as they arise.                                      | (Nelson et al., 2005) |                      |
|                     |                                                                                                   | ___ effectively integrates videos from different worldwide areas.                        |                       |                      |
| System Quality      | Integration                                                                                       | ___ pulls together information that used to come from different places around the world. | (Nelson et al., 2005) |                      |
|                     |                                                                                                   | ___ pulls together information that used to come from different places around the world. |                       |                      |

|                 |                                                                                                                                                                                                                                                                                                   |                     |
|-----------------|---------------------------------------------------------------------------------------------------------------------------------------------------------------------------------------------------------------------------------------------------------------------------------------------------|---------------------|
|                 | The ____ effectively integrates videos from different areas of the international users.                                                                                                                                                                                                           |                     |
|                 | The ____ allows information to be readily accessible to me.                                                                                                                                                                                                                                       |                     |
| Ease of Use     | The ____ makes information very accessible.<br>____ is easy to use.<br>Learning how to use ____ TikTok is easy for me.<br>When I use ____ first time, I didn't have any problems.                                                                                                                 |                     |
| Response Time   | It takes short time for ____ to respond to my request.<br>The ____ provides information in a timely fashion.<br>The ____ returns to answers my requests quickly.                                                                                                                                  |                     |
| Enjoyment       | I think that using ____ is enjoyable.<br>I think that watching ____ video is interesting.<br>I think that using ____ is pleasurable.<br>The actual process of watching videos on ____ is pleasant.<br>____ provide me endless surprising experiences.<br>I feel curious when I watch ____ videos. | (Cao et al., 2020)  |
| Concentration   | When watching ____ video, I am deeply engrossed.<br>When watching ____ video, I am absorbed intensely.<br>When watching ____ video, I concentrate fully on it.<br>When watching ____ video, my attention is focused on the activity.                                                              | (Chen et al., 2017) |
| Time Distortion | Time goes by very quickly when watching ____.                                                                                                                                                                                                                                                     |                     |

|                                          |                                                                                                                                                                                                                                                                                                                                                                                                                                                                                                                                                                                                                                                                                                                                                                                                                                                                                                                                                                                                                                                                                                                                                                                                       |                                |
|------------------------------------------|-------------------------------------------------------------------------------------------------------------------------------------------------------------------------------------------------------------------------------------------------------------------------------------------------------------------------------------------------------------------------------------------------------------------------------------------------------------------------------------------------------------------------------------------------------------------------------------------------------------------------------------------------------------------------------------------------------------------------------------------------------------------------------------------------------------------------------------------------------------------------------------------------------------------------------------------------------------------------------------------------------------------------------------------------------------------------------------------------------------------------------------------------------------------------------------------------------|--------------------------------|
|                                          | <p>I tend to lose track of time when watching ____.</p> <p>I tend to experience an insentient sense to time when watching ____.</p>                                                                                                                                                                                                                                                                                                                                                                                                                                                                                                                                                                                                                                                                                                                                                                                                                                                                                                                                                                                                                                                                   | <p>(Novak et al., 2000)</p>    |
| <p>TikTok<br/>addictive<br/>behavior</p> | <p>The idea of using ____ comes as the first thought on mind when wake up each morning.</p> <p>My life would be joyless hadn't there been ____.</p> <p>I feel distressed once I cease using ____ for a certain period.</p> <p>I feel missing something after stopping ____ for a certain period.</p> <p>I feel very vigorous upon watching ____ video regardless of the fatigues experienced.</p> <p>I can't help turning on ____ even when I'm not planning on using it.</p> <p>I find that I have been hooking on ____ longer and longer.</p> <p>I watch ____ videos for a longer period and spend more time than I had intended.</p> <p>I need to spend an increasing time on ____ to achieve same satisfaction as before.</p> <p>I try to spend less time on ____, but the efforts were in vain.</p> <p>I make it a habit to watch ____ videos and the sleep quality and total sleep time decreased.</p> <p>My recreational activities are reduced due to watching ____ videos.</p> <p>Watching ____ videos has exercised certain negative effects on my schoolwork or job performance.</p> <p>I find myself indulged on the ____ at the cost of hanging out with family members and friends.</p> | <p>(Yu &amp; Fu-min, 2005)</p> |

---

I feel aches and soreness in the back or eye  
discomforts due to excessive \_\_\_ use.

I have slept less than 4 hours due to  
watching \_\_\_ more than once.

I watch \_\_\_ videos for a longer period of time  
than I had intended.

I feel tired on daytime due to late-night use  
of \_\_\_.

I was told more than once that I spent too much  
time on \_\_\_.

I feel missing something after stop using  
for a certain period of time.

---
